# Supplementary material for: Prussian Blue mesocrystals prepared by a facile hydrothermal method
Source: Royal Society of Chemistry journal article supplement (doi:10.1039/b911613n), 2009-01-01
Supplement: b911613n.pdf [file b911613n.pdf]

## Supporting Information

# Prussian blue Mesocrystals prepared by a facile hydrothermal method

*Ming Hu,<sup>a</sup> Ji-Sen Jiang,<sup>\*a</sup> Rui-Ping Ji,<sup>a</sup> and Yi Zeng<sup>b</sup>*

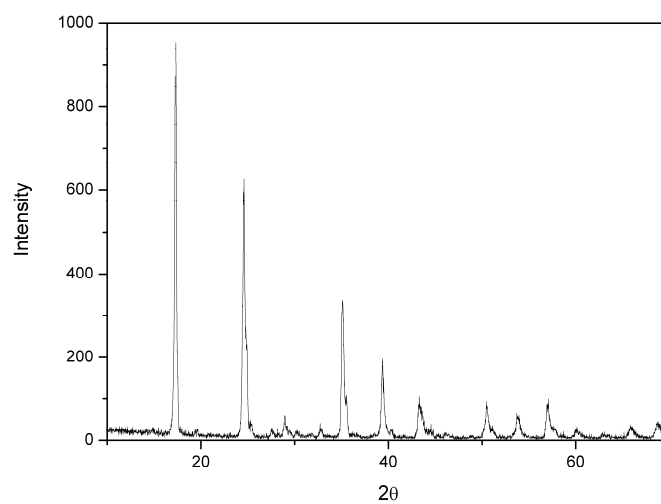

**Fig. S1** XRD of sample prepared following a typical procedure.

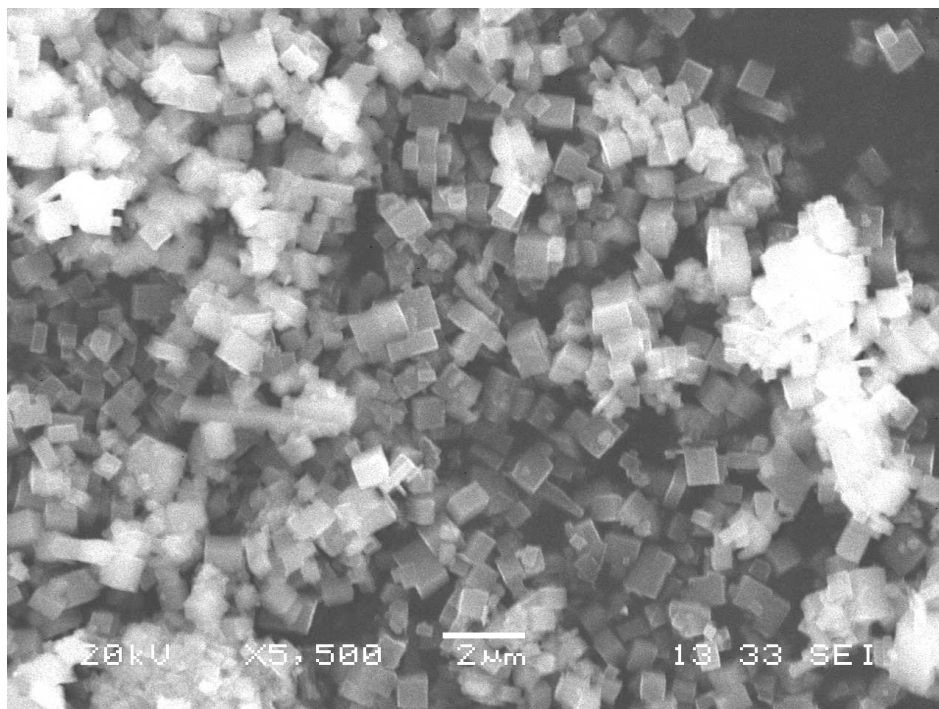

**Fig. S2** SEM image of sample prepared in the presence of 0.01 mol/L KCl and 0.032 mol/L  $K_4[Fe(CN)_6]$  at 120 °C for 24 h without HCl.

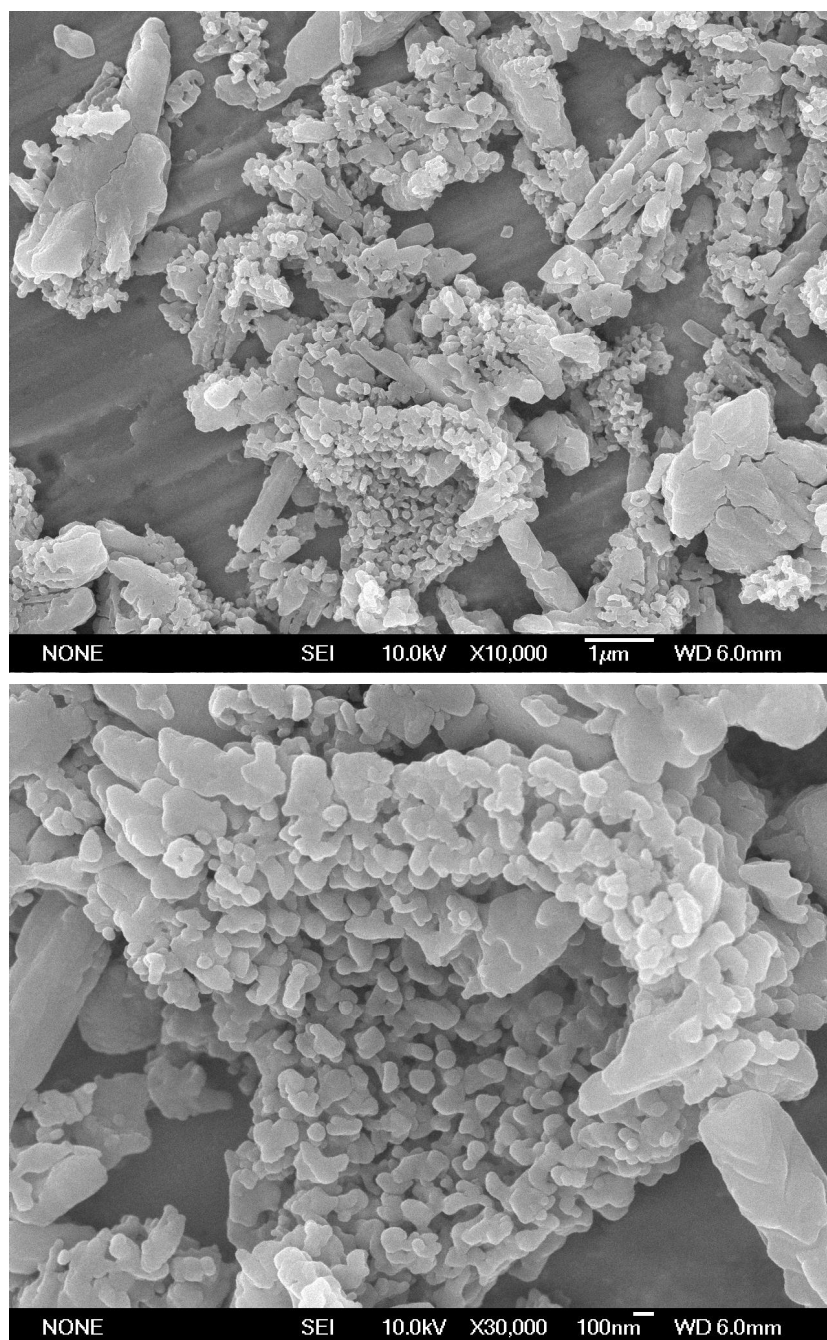

**Fig. S3** SEM image of sample prepared in the presence of 2 mol/L HCl and 0.032 mol/L  $K_4[Fe(CN)_6]$  at 160 °C for 24 h. The lower one is a enlarged photo of upper one.

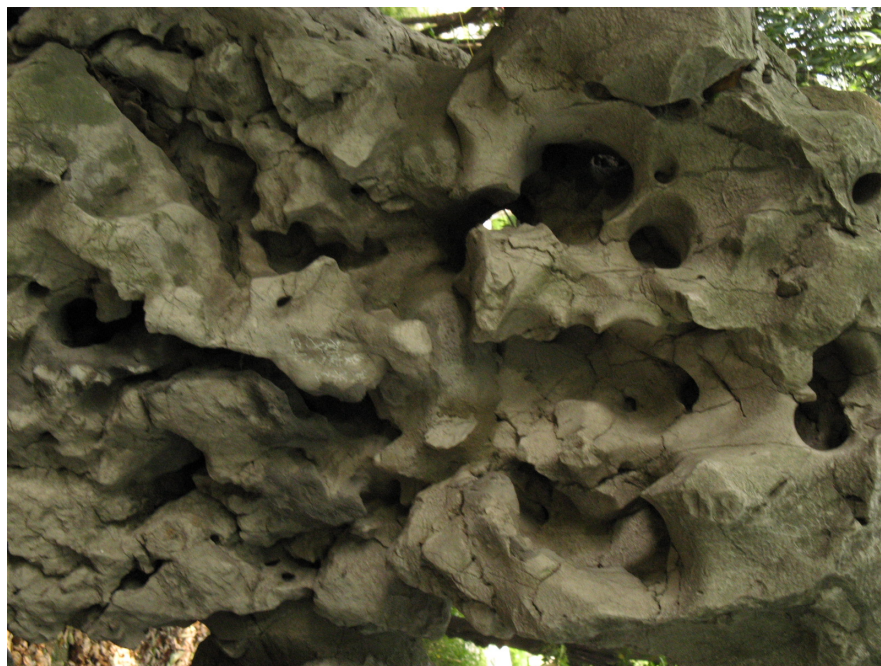

Fig. S4 Photo of Taihu stone.
